# Supplementary material for: Somatic molecular subtyping of prostate tumors from HOXB13 G84E carriers
Source: PubMed Central journal article supplement (PMC5410261; doi:10.18632/oncotarget.15196), 2017-02-08
Supplement: oncotarget-08-22772-s001.pdf [file oncotarget-08-22772-s001.pdf]

## Somatic molecular subtyping of prostate tumors from *HOXB13* G84E carriers

### Supplementary Materials

**Supplementary Table 1: Clinical-pathologic data for *HOXB13* G84E carriers and controls**

|                     | <i>HOXB13</i> WT ( <i>n</i> = 375) | <i>HOXB13</i> G84E ( <i>n</i> = 102) | <i>P</i> -value |
|---------------------|------------------------------------|--------------------------------------|-----------------|
| Age (median, IQR)   | 59 (54–63)                         | 55 (51–60)                           | < 0.001         |
| Prostate weight, g  | 50 (42–60)                         | 47 (39–54)                           | 0.0027          |
| RP grade group      |                                    |                                      |                 |
| 1 (GS6)             | 109 (29.1%)                        | 59 (58.4%)                           | < 0.001         |
| 2 (GS3+4=7)         | 143 (38.1%)                        | 25 (24.8%)                           |                 |
| 3 (GS4+3=7)         | 79 (21.1%)                         | 9 (8.9%)                             |                 |
| 4 (GS8)             | 32 (8.5%)                          | 3 (3.0%)                             |                 |
| 5 (GS9-10)          | 12 (3.2%)                          | 5 (5.0%)                             |                 |
| RP pathologic stage |                                    |                                      |                 |
| pT2N0               | 214 (57.1%)                        | 70 (70%)                             | 0.069           |
| pT3aN0              | 117 (31.2%)                        | 24 (24%)                             |                 |
| pT3bN0              | 33 (8.8%)                          | 3 (3%)                               |                 |
| pTxN1               | 11 (2.9%)                          | 3 (3%)                               |                 |

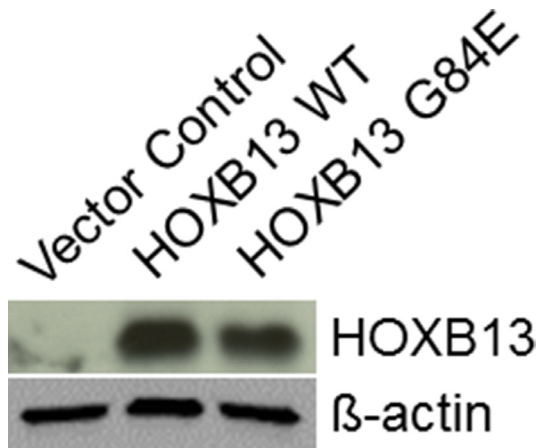

**Supplementary Figure 1: Immunoblot using HOXB13 antibody utilized for immunohistochemistry in Figure 1.** DU145 cell lines stably expressing *HOXB13* WT or G84E were generated using lentivirus system. Whole cell lysates from cell lines were prepared with sonication in a buffer containing 50 mM Tris-HCl pH 7.5, 1 mM EDTA and 2%SDS. Western blot analysis of 5 ug of protein was performed using 0.2 μg/ml HOXB13 antibody (AF8156, R&D Systems) and β-actin antibody (ab8227, Abcam). The immunogen for this antibody was an E.coli -derived human HOXB13 fragment, amino acid residues 1-102. On immunoblotting, this antibody recognizes a single band of molecular weight 37 kd in extracts of prostate tissues and cell lines.

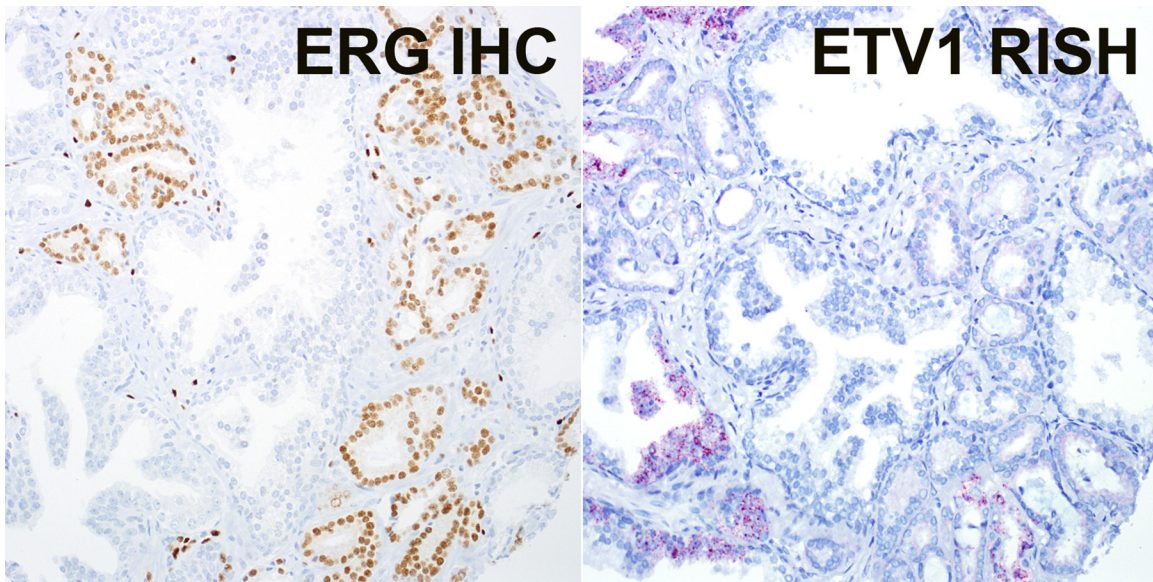

**Supplementary Figure 2: Case with heterogeneous staining for ERG by immunohistochemistry (IHC) and ETV1 RNA *in situ* hybridization (RISH).** This case appears to be a collision tumor as some tumor glands are positive for ERG and others are positive for ETV1. Images at 200× magnification.
